# Supplementary material for: Systematic Literature Review of DPP-4 Inhibitors in Patients with Type 2 Diabetes Mellitus and Renal Impairment
Source: Springer Nature journal article supplement (doi:10.1007/s13300-016-0189-4), 2016-08-08
Supplement: MOESM1 [file 10565158]

## SUPPLEMENTARY MATERIAL

**Table S1. Systematic review inclusion and exclusion criteria.**

| Criteria         | Inclusion                                                                                                     | Exclusion                                                                                                                                                                            |
|------------------|---------------------------------------------------------------------------------------------------------------|--------------------------------------------------------------------------------------------------------------------------------------------------------------------------------------|
| Study type       | Study conducted in humans                                                                                     | Study conducted in plants or animals                                                                                                                                                 |
| Treatment        | Intervention includes a DPP-4 inhibitor                                                                       | Intervention does not include a DPP-4 inhibitor                                                                                                                                      |
| Publication type | Clinical trial                                                                                                | Review<br>Case report<br>Cost-benefit analysis<br>Meta-analysis<br>Conference abstract<br>Editorial/letter to editor<br>Full text not available                                      |
| Study design     | Randomized-controlled trial                                                                                   | Study not controlled/single arm<br>Study not randomized/observational study<br>Cross-over study<br>Not double blind<br>Pre-clinical or phase 1 study<br>Time-to-event analysis       |
| Study population | Type 2 diabetes mellitus with renal impairment                                                                | No type 2 diabetes mellitus<br>Healthy individuals/volunteers<br>No renal impairment                                                                                                 |
| Outcomes         | Study includes $\geq 1$ of the following outcome measures:<br>HbA1c, FPG, weight, hypoglycemia, lipid profile | Study does not include any of the following outcome measures:<br>HbA1c<br>FPG<br>Weight<br>Hypoglycemia<br>Lipid profile (total cholesterol, triglycerides, VLDL, LDL, HDL, non-HDL) |
| Trial length     | $\geq 12$ -week long                                                                                          | $< 12$ -week long                                                                                                                                                                    |
| Sample size      | $\geq 50$ patients in the study                                                                               | $< 50$ patients in the study                                                                                                                                                         |
| Comparator arm   | DPP-4 inhibitor trial has a common comparator arm to a vildagliptin trial                                     | DPP-4 inhibitor trial lacks a common comparator arm to a vildagliptin trial                                                                                                          |

*DPP-4* dipeptidyl peptidase-4, *HbA1c* glycated hemoglobin, *FPG* fasting plasma glucose, *VLDL* very low-density lipoprotein cholesterol, *LDL* low-density lipoprotein cholesterol, *HDL* high-density lipoprotein cholesterol, *non-HDL* non-high density lipoprotein-cholesterol.

**Table S2. DPP-4 inhibitor studies included in systematic literature review.**

| <b>Study no.</b> | <b>Study description</b>                                                                                                                                                                    | <b>Randomization (no. of patients)</b>                                                                                                                              | <b>Treatment duration (weeks)</b>                                | <b>Renal definition</b>                                                                                                                                                                                                                                                                                 | <b>Publication</b> |
|------------------|---------------------------------------------------------------------------------------------------------------------------------------------------------------------------------------------|---------------------------------------------------------------------------------------------------------------------------------------------------------------------|------------------------------------------------------------------|---------------------------------------------------------------------------------------------------------------------------------------------------------------------------------------------------------------------------------------------------------------------------------------------------------|--------------------|
| 1                | Efficacy/safety of sitagliptin versus placebo (first 12 weeks), followed by the active treatment with glipizide (for 42 weeks) in T2DM patients (HbA1c, 6.5–10%) with moderate to severe RI | Sitagliptin 50 mg qd or 25 mg qd: 65 patients<br><br>Placebo (first 12 weeks) followed by glipizide 5 mg daily uptitrated to 10 mg bid (last 42 weeks): 26 patients | 12 (placebo-controlled phase)<br><br>42 (active treatment phase) | Patients were stratified based on baseline renal function (CrCl) as estimated by the Cockcroft–Gault equation: stratum 1 – moderate renal insufficiency (CrCl, 30 to <50 mL/min and not on dialysis); stratum 2 – severe renal insufficiency (CrCl, <30 mL/min and not on dialysis or ESRD on dialysis) | [1]                |
| 2                | Placebo-controlled 24-week study (efficacy/safety) of vildagliptin in drug-naïve or previously treated T2DM patients (HbA1c, 6.5–10%) with moderate to severe RI                            | Vildagliptin<br>• Moderate RI: 165 patients<br>• Severe RI: 124 patients<br><br>Placebo<br>• Moderate RI: 129 patients<br>• Severe RI: 97 patients                  | 24                                                               | Estimated glomerular filtration rate by the Modification of Diet in Renal Disease formula $\geq 30$ to <50 mL/min/1.73 m <sup>2</sup> – moderate RI and <30 mL/min/1.73 m <sup>2</sup> – severe RI                                                                                                      | [2]                |

|   |                                                                                                                                                                                                                     |                                                                                                                                                                                                                                                             |    |                                                                                                                                                                                                                                                                                                                      |     |
|---|---------------------------------------------------------------------------------------------------------------------------------------------------------------------------------------------------------------------|-------------------------------------------------------------------------------------------------------------------------------------------------------------------------------------------------------------------------------------------------------------|----|----------------------------------------------------------------------------------------------------------------------------------------------------------------------------------------------------------------------------------------------------------------------------------------------------------------------|-----|
| 3 | Placebo-controlled 24-week study (efficacy/safety) of vildagliptin in drug-naïve or previously treated T2DM patients (HbA1c, 6.5–10%) with moderate to severe RI<br>52-week extension of study 2 [2]                | Vildagliptin:<br><ul style="list-style-type: none"> <li>• Moderate RI: 122 patients</li> <li>• Severe RI: 94 patients</li> </ul> Placebo:<br><ul style="list-style-type: none"> <li>• Moderate RI: 89 patients</li> <li>• Severe RI: 64 patients</li> </ul> | 52 | Estimated glomerular filtration rate by the Modification of Diet in Renal Disease formula $\geq 30$ to $< 50$ mL/min/1.73 m <sup>2</sup> – moderate RI and $< 30$ mL/min/1.73 m <sup>2</sup> – severe RI                                                                                                             | [3] |
| 4 | Placebo-controlled 12-week study (efficacy/safety) of saxagliptin in T2DM patients with moderate to severe RI inadequately controlled (HbA1c, 7–11%) on previous treatment with anti-diabetes drugs                 | Saxagliptin 2.5 mg qd:<br>85 patients<br><br>Placebo: 85 patients                                                                                                                                                                                           | 12 | Documented history of CrCl $< 50$ mL/min within the previous three months. The degree of RI was categorized based on the estimated CrCl determined by the Cockcroft–Gault equation as moderate (CrCl, $\geq 30$ to $< 50$ mL/min), severe (CrCl, $< 30$ mL/min and not on dialysis) or ESRD (receiving hemodialysis) | [4] |
| 5 | Efficacy/safety of saxagliptin versus placebo in T2DM patients with moderate to severe RI inadequately controlled (HbA1c, 7–11%) on previous treatment with anti-diabetes drugs<br>52-week extension of study 4 [4] | Saxagliptin 2.5 mg qd:<br>85 patients<br><br>Placebo: 85 patients                                                                                                                                                                                           | 52 | Documentation of CrCl $< 50$ mL/min (estimated by the Cockcroft–Gault equation) as moderate (CrCl, $\geq 30$ to $< 50$ mL/min), severe (CrCl, $< 30$ mL/min and not on dialysis) or ESRD (receiving hemodialysis)                                                                                                    | [5] |
| 6 | Placebo-controlled 52-week study (efficacy/safety) of linagliptin in T2DM patients with severe RI inadequately controlled (HbA1c, $> 7\%$ to $\leq 10\%$ ) on previous treatment with anti-diabetes drugs           | Linagliptin 5 mg qd:<br>68 patients<br><br>Placebo: 65 patients                                                                                                                                                                                             | 52 | Participants fulfilled the criteria for severe RI (CKD stage 4/5) at screening, having an estimated glomerular filtration rate calculated by the Modification of Diet in Renal Disease study equation of 30 mL/min/1.73 m <sup>2</sup> (while not receiving chronic dialysis)                                        | [6] |

|   |                                                                                                                                                                                               |                                                                                                                                 |                                                                  |                                                                                                                         |     |
|---|-----------------------------------------------------------------------------------------------------------------------------------------------------------------------------------------------|---------------------------------------------------------------------------------------------------------------------------------|------------------------------------------------------------------|-------------------------------------------------------------------------------------------------------------------------|-----|
| 7 | Efficacy/safety of linagliptin versus placebo (first 12 weeks), followed by the active treatment with glimepiride (for 40 weeks) in T2DM patients (HbA1c, 7.0–10%) with moderate to severe RI | Linagliptin 5 mg qd: 113 patients<br>Placebo (first 12 weeks) followed by glimepiride 1–4 mg daily (for 40 weeks): 122 patients | 12 (placebo-controlled phase)<br><br>42 (active treatment phase) | Estimated glomerular filtration rate by the Modification of Diet in Renal Disease formula $<60 \text{ mL/min/1.73 m}^2$ | [7] |
|---|-----------------------------------------------------------------------------------------------------------------------------------------------------------------------------------------------|---------------------------------------------------------------------------------------------------------------------------------|------------------------------------------------------------------|-------------------------------------------------------------------------------------------------------------------------|-----|

*bid* twice daily, *CrCl* creatinine clearance, *CKD* chronic kidney disease, *DPP-4* dipeptidyl peptidase-4, *HbA1c* glycated hemoglobin, *qd* once daily, *RI* renal impairment, *T2DM* type 2 diabetes mellitus.

## REFERENCES

1. Chan JC, Scott R, Arjona Ferreira JC, et al. Safety and efficacy of sitagliptin in patients with type 2 diabetes and chronic renal insufficiency. *Diabetes Obes Metab.* 2008;10(7):545–55.
2. Lukashevich V, Schweizer A, Shao Q, et al. Safety and efficacy of vildagliptin versus placebo in patients with type 2 diabetes and moderate or severe renal impairment: a prospective 24-week randomized placebo-controlled trial. *Diabetes Obes Metab.* 2011;13(10):947–54.
3. Kothny W, Shao Q, Groop PH, Lukashevich V. One-year safety, tolerability and efficacy of vildagliptin in patients with type 2 diabetes and moderate or severe renal impairment. *Diabetes Obes Metab.* 2012;14(11):1032–9.
4. Nowicki M, Rychlik I, Haller H, et al. Saxagliptin improves glycaemic control and is well tolerated in patients with type 2 diabetes mellitus and renal impairment. *Diabetes Obes Metab.* 2011;13(6):523–32.
5. Nowicki M, Rychlik I, Haller H, et al. Long-term treatment with the dipeptidyl peptidase-4 inhibitor saxagliptin in patients with type 2 diabetes mellitus and renal impairment: a randomised controlled 52-week efficacy and safety study. *Int J Clin Pract.* 2011;65(12):1230–9.
6. McGill JB, Sloan L, Newman J, et al.: Long-term efficacy and safety of linagliptin in patients with type 2 diabetes and severe renal impairment: a 1-year, randomized, double-blind, placebo-controlled study. *Diabetes Care.* 2013;36(2):237–44.
7. Laakso M, Rosenstock J, Groop PH, et al. Treatment with the dipeptidyl peptidase-4 inhibitor linagliptin or placebo followed by glimepiride in patients with type 2 diabetes with moderate to severe renal impairment: a 52-week, randomized, double-blind clinical trial. *Diabetes Care.* 2015;38(2):e15–7.
